# Supplementary material for: Performance and failure mechanisms of alkaline zinc anodes with addition of calcium zincate (Ca[Zn(OH)3]2·2H2O) under industrially relevant conditions
Source: Royal Society of Chemistry journal article supplement (doi:10.1039/d4ya00093e), 2024-01-01
Supplement: d4ya00093e1.pdf [file d4ya00093e1.pdf]

Supplemental Information

Performance and Failure Mechanisms of Alkaline Zinc Anodes with Addition of Calcium  
Zincate ( $\text{Ca}[\text{Zn}(\text{OH})_3]_2 \cdot 2\text{H}_2\text{O}$ ) Under Industrially Relevant Conditions

Patrick K. Yang<sup>1,2,3</sup>, Damon E. Turney<sup>3\*</sup>, Michael Nyce<sup>3</sup>, Bryan R. Wygant<sup>5</sup>, Timothy N. Lambert<sup>5,6</sup>, Stephen O'Brien<sup>1,2,3</sup>, Gautam G. Yadav<sup>7</sup>, Meir Weiner<sup>7</sup>, Shinju Yang<sup>7</sup>, Brendan E. Hawkins<sup>7</sup>, Sanjoy Banerjee<sup>3,4,7</sup>

1. Ph.D. Program in Chemistry, The Graduate Center of the City University of New York, 365 Fifth Avenue, New York, New York 10016, USA
2. Department of Chemistry and Biochemistry, The City College of New York, Marshak Science Building, Room 1024, 160 Convent Avenue, New York, NY 10031, USA
3. The CUNY Energy Institute, The City College of New York, City University of New York, Steinman Hall, 160 Convent Avenue, New York, NY 10031, USA
4. Department of Chemical Engineering, The City College of New York, Steinman Hall, 160 Convent Avenue, New York, NY 10031, United States
5. Department of Photovoltaics and Materials Technology, Sandia National Laboratories, Albuquerque, NM 87185, USA
6. Center for Integrated Nanotechnologies, Sandia National Laboratories, Albuquerque, NM 87185, USA
7. Urban Electric Power Inc., Pearl River, NY 10965, USA

## Supplemental Figures

**Table S1 a)** Bill of materials (BOM) for different materials needed for calcium zincate (CaZn) based anodes, rough estimates of cost (\$/kg) at scale from publicly available seller information on Alibaba.com in 2023 **b)** Rough estimate of theoretical cost of CaZn based on starting materials.

(a) Rough Bill of Materials (BOM) Cost at Scale - Estimated from Publicly Available info on Alibaba.com

| Zn (\$/kg) | ZnO (\$/kg) | Rough Estimate of Calcium Zincate based on starting materials (\$/kg) | Bi <sub>2</sub> O <sub>3</sub> (\$/kg) | Ca(OH) <sub>2</sub> (\$/kg) | PTFE Dispersion 60 wt.% Solids in water (\$/kg) | 25 wt.% KOH (\$/kg) |
|------------|-------------|-----------------------------------------------------------------------|----------------------------------------|-----------------------------|-------------------------------------------------|---------------------|
| 4.06       | 1           | 1.71                                                                  | 8                                      | 0.3                         | 9.43                                            | 0.95                |

(b) Rough Cost to Manufacture Tetragonal Calcium Zincate Based on Sharma Recipe

|    | Zinc Oxide (ZnO) | Calcium Hydroxide (Ca(OH) <sub>2</sub> ) | Potassium Hydroxide (KOH) | Deionized Water | Calcium Zincate (CaZn) |
|----|------------------|------------------------------------------|---------------------------|-----------------|------------------------|
| kg | 23               | 10                                       | 100                       | 14.6            | 35                     |
| \$ | 23               | 3                                        | 11.23                     | 14.6            | 51.83                  |

**Table S2:** Summary of all cycled anode compositions types, names, and cycles until 70% capacity retention for each anode with repeats.

| Cell # | Name Zn:CaZn wt. % then additives | Anode Composition (remaining balance PTFE binder) (wt.%) | Cell Names                                         | 20% Zn Utilization Cycle life (70% Capacity Retention) | Total Charged Energy (Wh/cycle) (70% Capacity Retention) | Total Discharged Energy (Wh/cycle) (70% Capacity Retention) |
|--------|-----------------------------------|----------------------------------------------------------|----------------------------------------------------|--------------------------------------------------------|----------------------------------------------------------|-------------------------------------------------------------|
| 1      | 86:0:C                            | 86% Zn, 10% Acetylene Carbon Black                       | PY_CalZinc_Carbon_Repeat6_2x3_052722-01-035        | 1062                                                   |                                                          |                                                             |
| 2      | 86:0:Bi                           | 86% Zn, 10% Bi <sub>2</sub> O <sub>3</sub>               | PY_Zn_Bi2O3_2x3_Cell_S3-01-035                     | 49                                                     | 0.737                                                    | 0.579                                                       |
| 3      |                                   |                                                          | PY_CalZinc_Zn_Bi2O3_2x3_Cell_1D_102122-01-037      | 31                                                     | 0.821                                                    | 0.645                                                       |
| 4      | 60:26:Bi                          | 60% Zn, 26% CaZn, 10% Bi <sub>2</sub> O <sub>3</sub>     | PY_CalZinc_Zn_Bi2O3_2x3_Cell_12_121722-01-033      | 60                                                     | 1.682                                                    | 1.382                                                       |
| 5      |                                   |                                                          | PY_CalZinc_Zn_Bi2O3_2x3_Cell_1C_102122-01-039      | 61                                                     | 1.610                                                    | 1.292                                                       |
| 6      |                                   |                                                          | PY_CalZinc_Zn_Bi2O3_2x3_Cell_2A_111322-01-036      | 65                                                     | 1.741                                                    | 1.150                                                       |
| 7      |                                   |                                                          | PY_CalZinc_Zn_Bi2O3_2x3_Cell_3-01-041              | 132                                                    | 1.823                                                    | 1.081                                                       |
| 8      | 26:60:Bi                          | 26% Zn, 60% CaZn, 10% Bi <sub>2</sub> O <sub>3</sub>     | PY_CalZinc_Zn_Bi2O3_2x3_Cell_3A_cont_011223-01-099 | 113                                                    | 1.833                                                    | 0.931                                                       |
| 9      |                                   |                                                          | PY_CalZinc_Zn_Bi2O3_2x3_Cell_4A_01052023-01-039    | 270                                                    | 1.767                                                    | 1.255                                                       |
| 10     | 0:86:Bi                           | 86% CaZn, 10% Bi <sub>2</sub> O <sub>3</sub>             | PY_CalZinc_Zn_Bi2O3_2x3_Test_7_091922-01-042       | 283                                                    | 1.805                                                    | 1.177                                                       |
| 11     | 0:86:C                            | 86% CaZn, 10% Acetylene Carbon Black                     | PY_CalZinc_Zn_Bi2O3_2x3_Cell_8-01-038              | 274                                                    | 1.786                                                    | 1.255                                                       |
| 12     |                                   |                                                          | PY_CalZinc_Zn_Bi2O3_2x3_Cell_9_1-01-040            | 259                                                    | 1.570                                                    | 0.952                                                       |
| 13     | 0:86:C:CTAB                       | 86% CaZn, 9% Acetylene Carbon Black, 2% CTAB             | PY_CalZinc_Carbon_CTAB_2x3_Cell_9A-01-004          | 172                                                    | 1.784                                                    | 1.224                                                       |

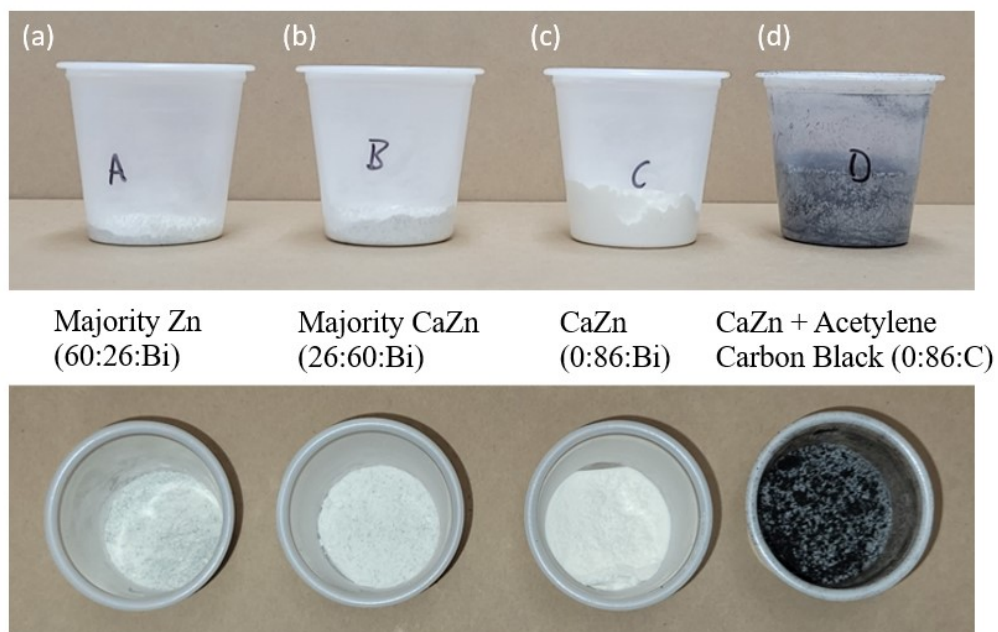

**Figure S1:** Optical image of dry powder without binders of the four common cell formulations (a) majority Zn (60:26:Bi), (b) majority CaZn (26:60:Bi), (c) pure CaZn (0:86:Bi), and (d) pure CaZn + acetylene carbon black (0:86:C)

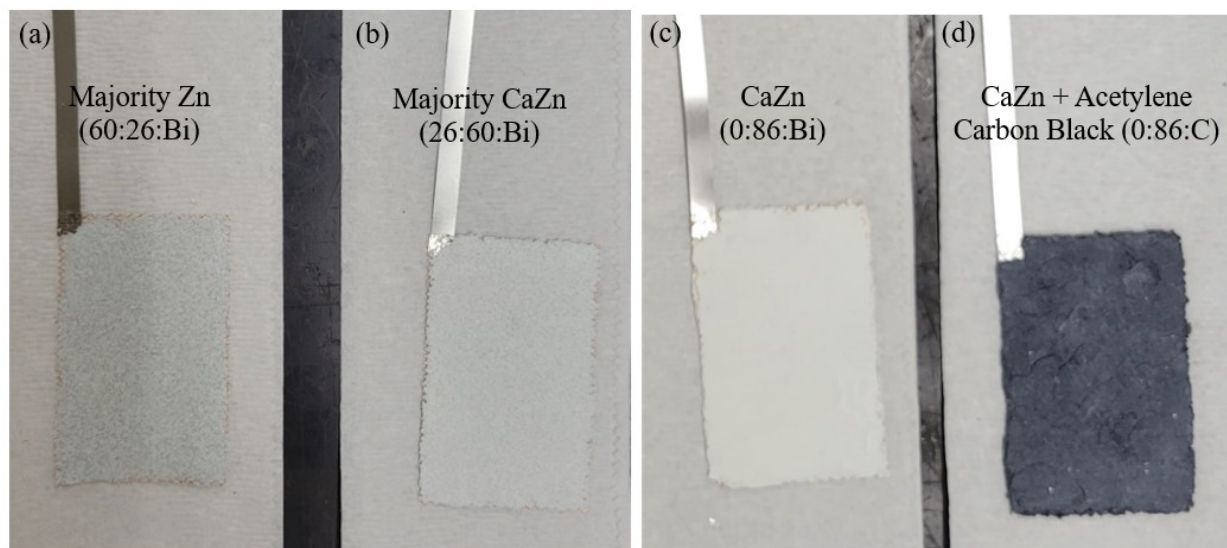

**Figure S2:** Images of (a) cell formulation #1 (majority Zn (60:26:Bi)), (b) cell formulation #2 (majority CaZn (26:60:Bi)), (c) cell formulation #3 (pure CaZn (0:86:Bi)), and cell formulation #4 (pure CaZn (0:86:C))

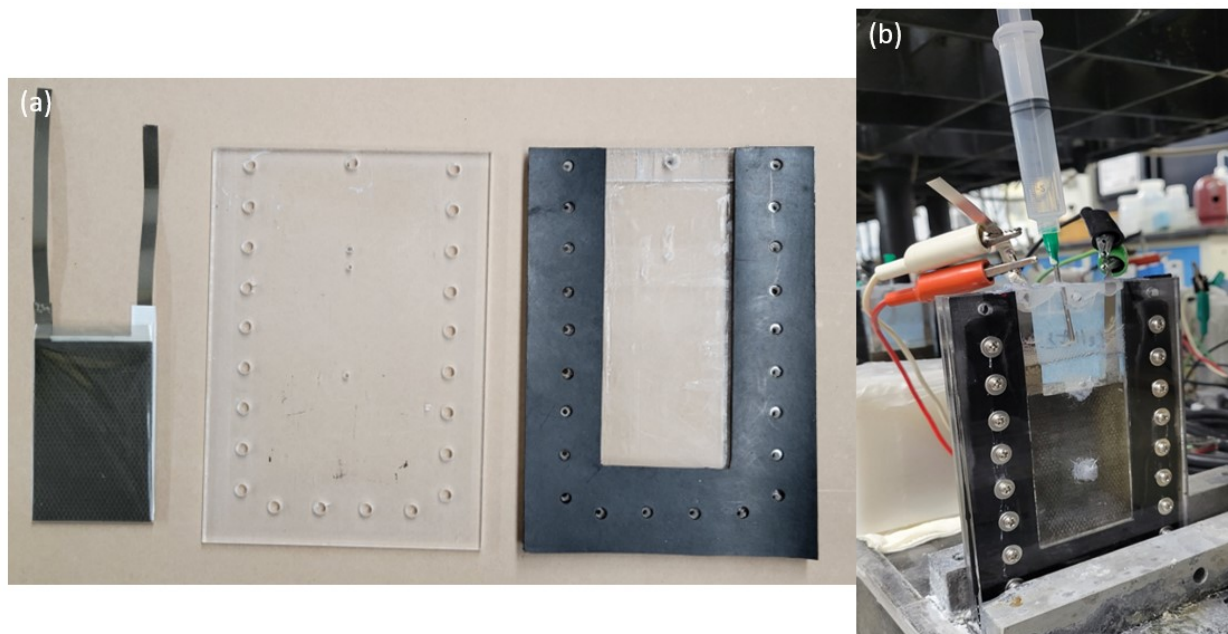

**Figure S3:** Images showing (a) anode and cathode battery pack wrapped with separators (b) two custom cut PMMA plexiglass sheets and buna rubber gasket with screw holes, and (c) fully assembled and sealed battery.

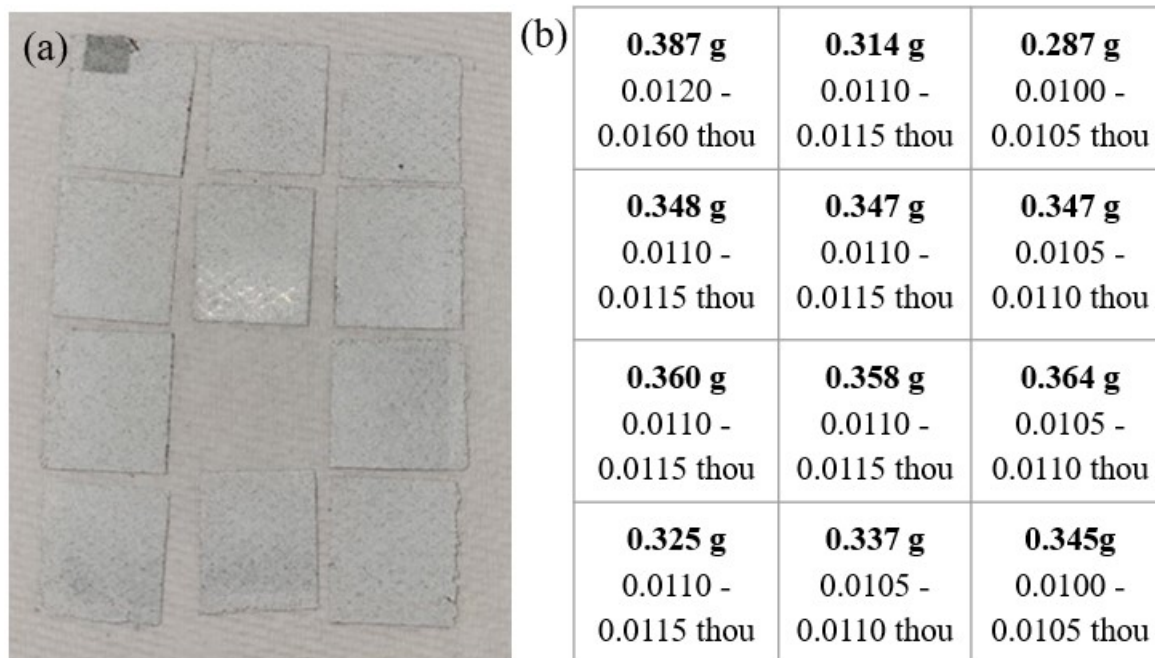

**Figure S4:** a) Optical image of freshly rolled, pressed, and dissected anode cell formulation #1 (60 wt.% Zn, 26 wt.% CaZn, 10 wt.% Bi<sub>2</sub>O<sub>3</sub>, and 4 wt.% PTFE) B) Table showing the weight and thickness of the samples.



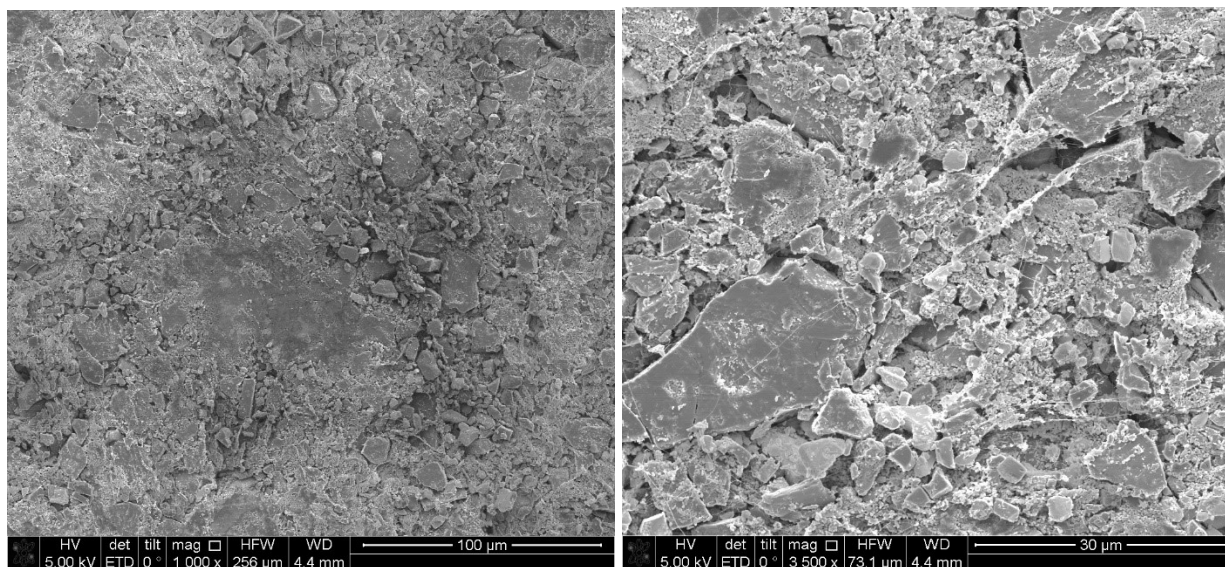

**Figure S5:** SEM image of freshly rolled and pressed anode cell formulation #1 (60 wt.% Zn, 26 wt.% CaZn, 10 wt.% Bi<sub>2</sub>O<sub>3</sub>, and 4 wt.% PTFE)

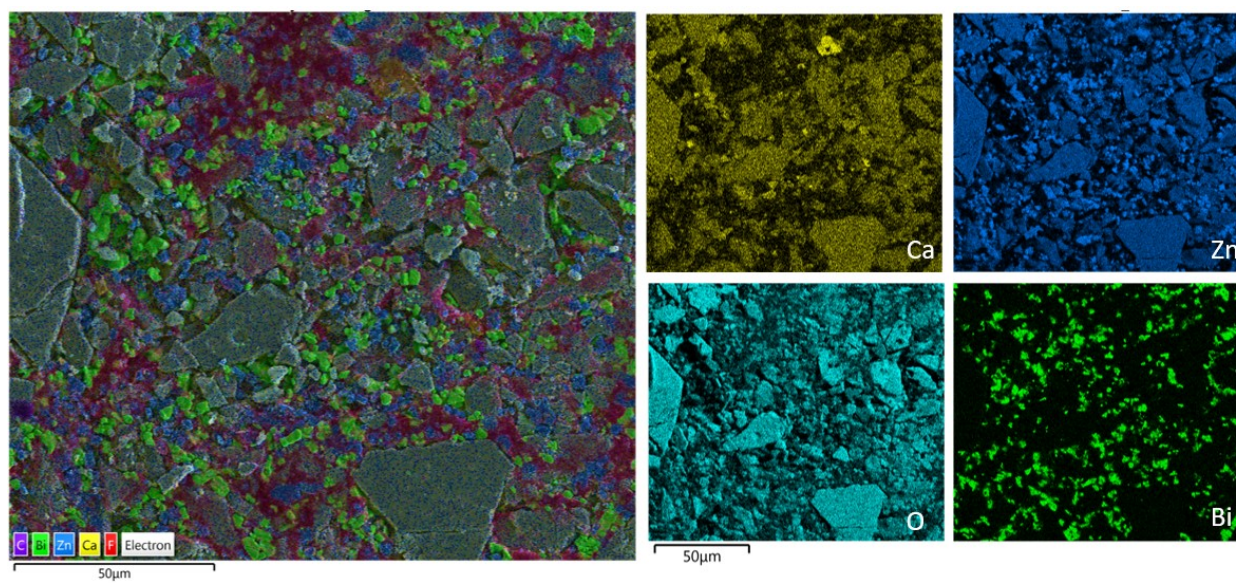

**Figure S6:** Top-down SEM image of freshly rolled and pressed anode cell formulation #1 (60 wt.% Zinc, 26 wt.% CaZn, 10 wt.% Bi<sub>2</sub>O<sub>3</sub>, and 4 wt.% PTFE)



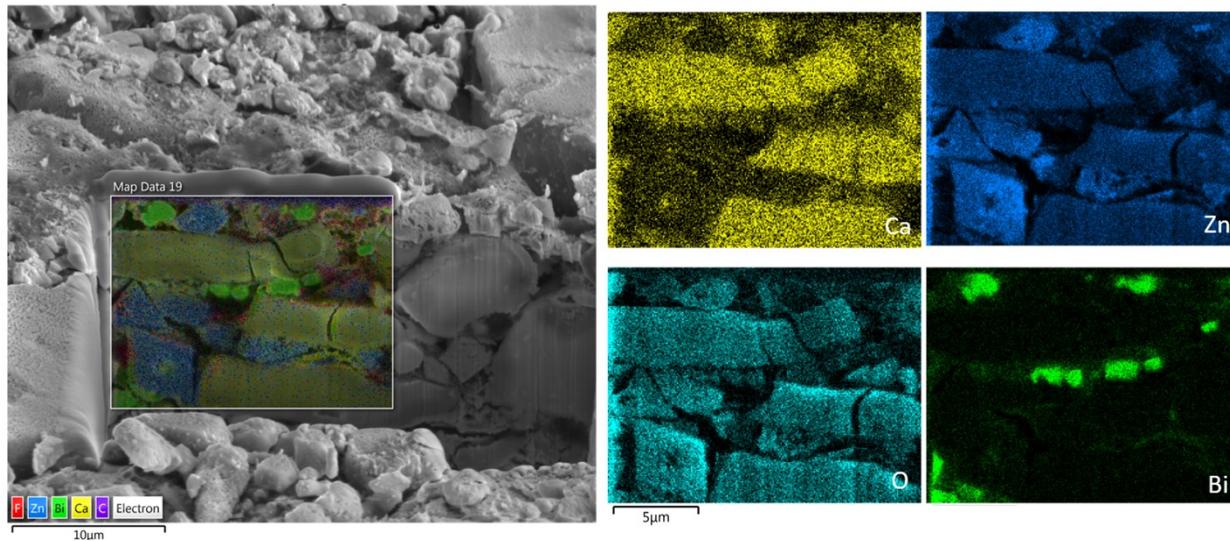

**Figure S7:** SEM-FIB EDS mapping image of freshly rolled and pressed anode cell formulation #1 (60 wt.% Zinc, 26 wt.% CaZn, 10 wt.% Bi<sub>2</sub>O<sub>3</sub>, and 4 wt.% PTFE)

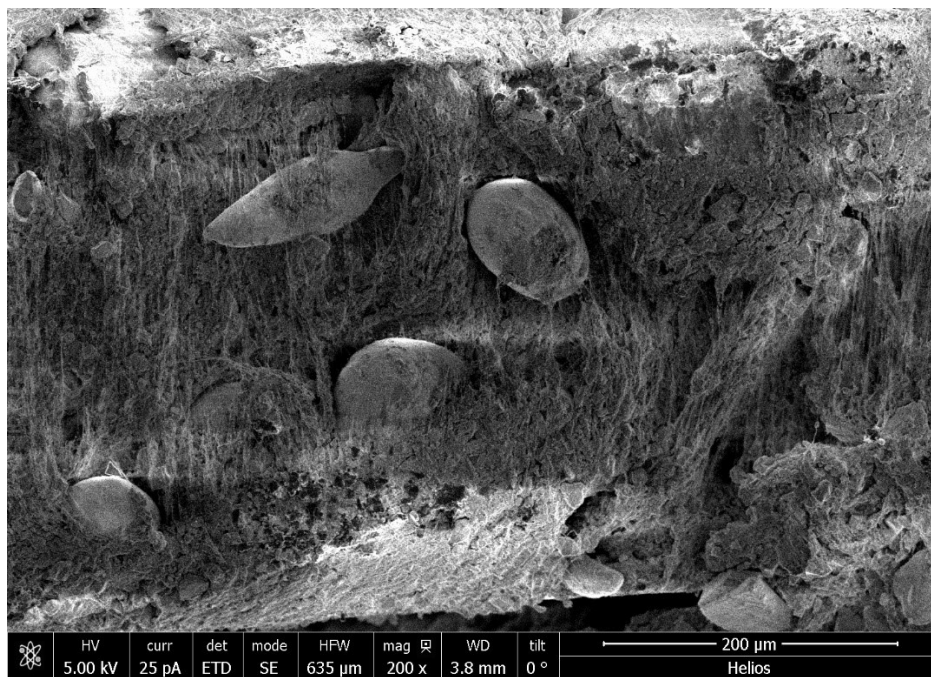

**Figure S8:** Cross-sectional SEM image of freshly rolled and pressed anode cell formulation #1 (60 wt.% Zinc, 26 wt.% CaZn, 10 wt.% Bi<sub>2</sub>O<sub>3</sub>, and 4 wt.% PTFE)

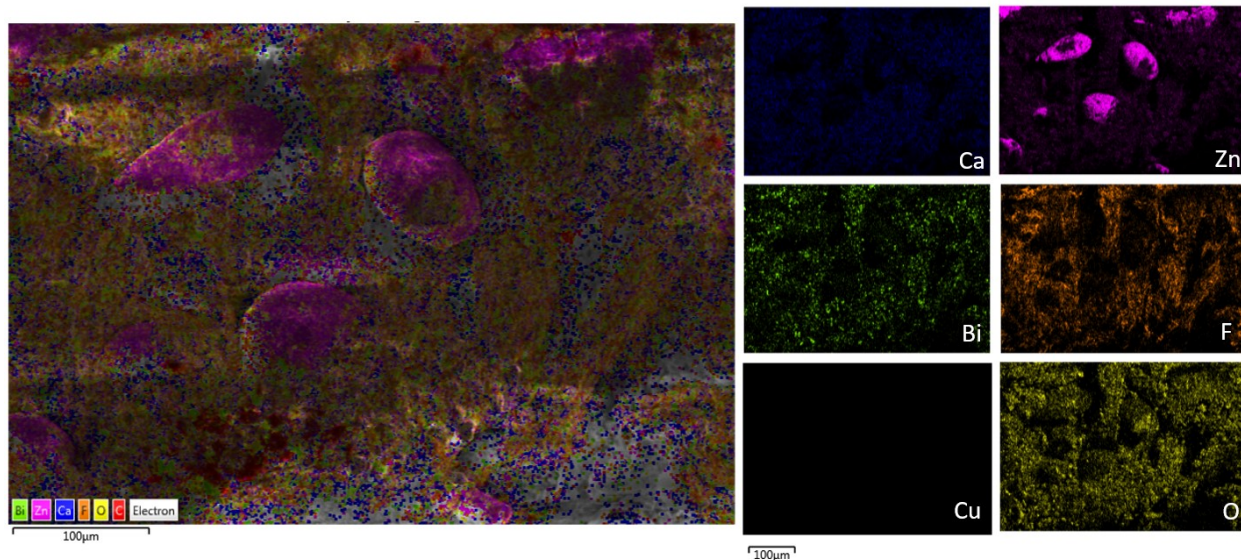

**Figure S9** Cross sectional SEM- EDS mapping of cell formulation #1 (60 wt.% Zinc, 26 wt.% CaZn, 10 wt.% Bi<sub>2</sub>O<sub>3</sub>, and 4 wt.% PTFE) showing elemental mapping of the anode before cycling.

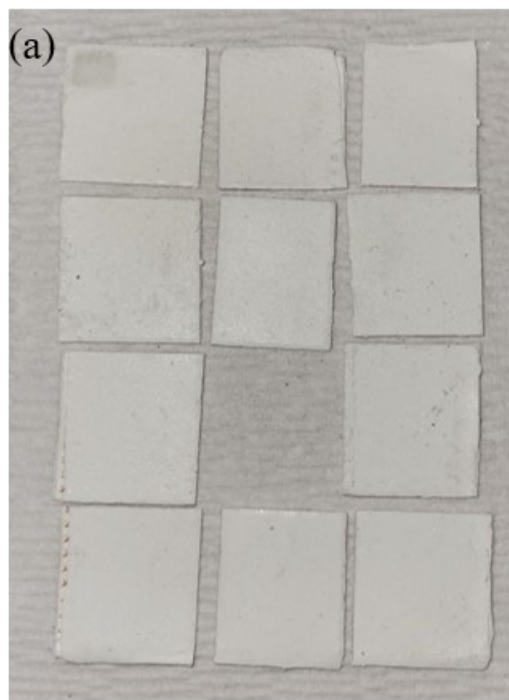

(b)

|                                           |                                           |                                           |
|-------------------------------------------|-------------------------------------------|-------------------------------------------|
| <b>0.678 g</b><br>0.0360 -<br>0.0370 thou | <b>0.515 g</b><br>0.0340 -<br>0.0350 thou | <b>0.533 g</b><br>0.0340 -<br>0.0360 thou |
| <b>0.640 g</b><br>0.0340 -<br>0.0350 thou | <b>0.579 g</b><br>0.0350 -<br>0.0370 thou | <b>0.574 g</b><br>0.0350 -<br>0.0365 thou |
| <b>0.658 g</b><br>0.0355 -<br>0.0360 thou | <b>0.567 g</b><br>0.0360 -<br>0.0370 thou | <b>0.629 g</b><br>0.0350 -<br>0.0360 thou |
| <b>0.625 g</b><br>0.0355 -<br>0.0360 thou | <b>0.603 g</b><br>0.0405 -<br>0.0410 thou | <b>0.607 g</b><br>0.0370 -<br>0.0380 thou |

**Figure S10:** a) Image of freshly rolled and pressed anode cell formulation #3 (86 wt.% CaZn, 10 wt.% Bi<sub>2</sub>O<sub>3</sub>, and 4 wt.% PTFE) dissected for analysis b) Table showing the weight and thickness range of the samples.

F



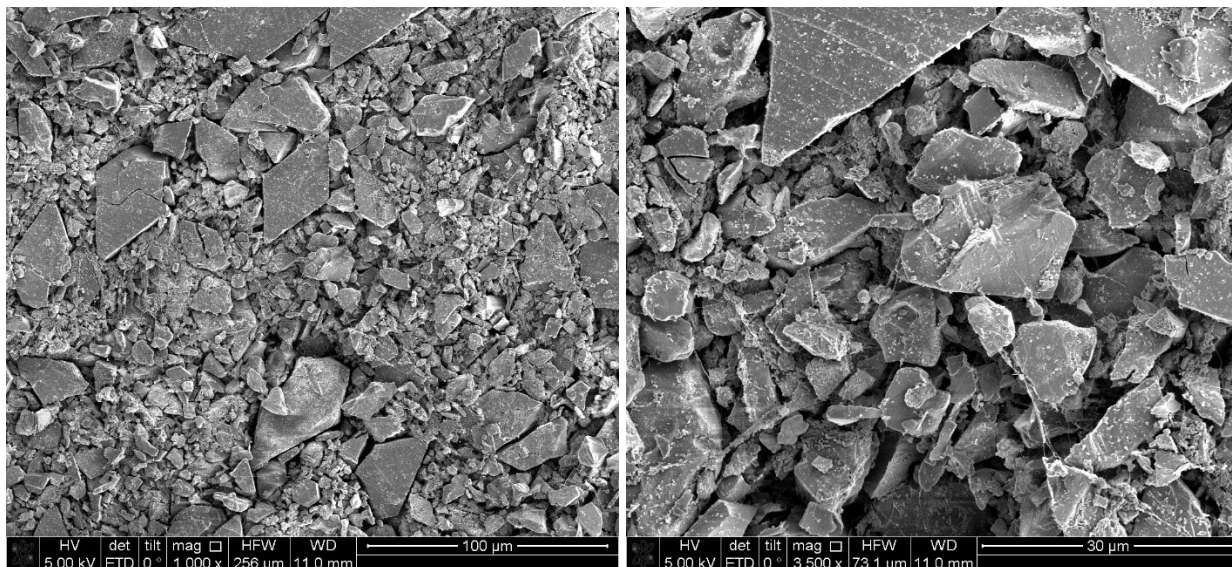

**Figure S11:** Top-down SEM images of freshly rolled and pressed anode cell formulation #3 (86 wt.% CaZn, 10 wt.% Bi<sub>2</sub>O<sub>3</sub>, and 4 wt.% PTFE)

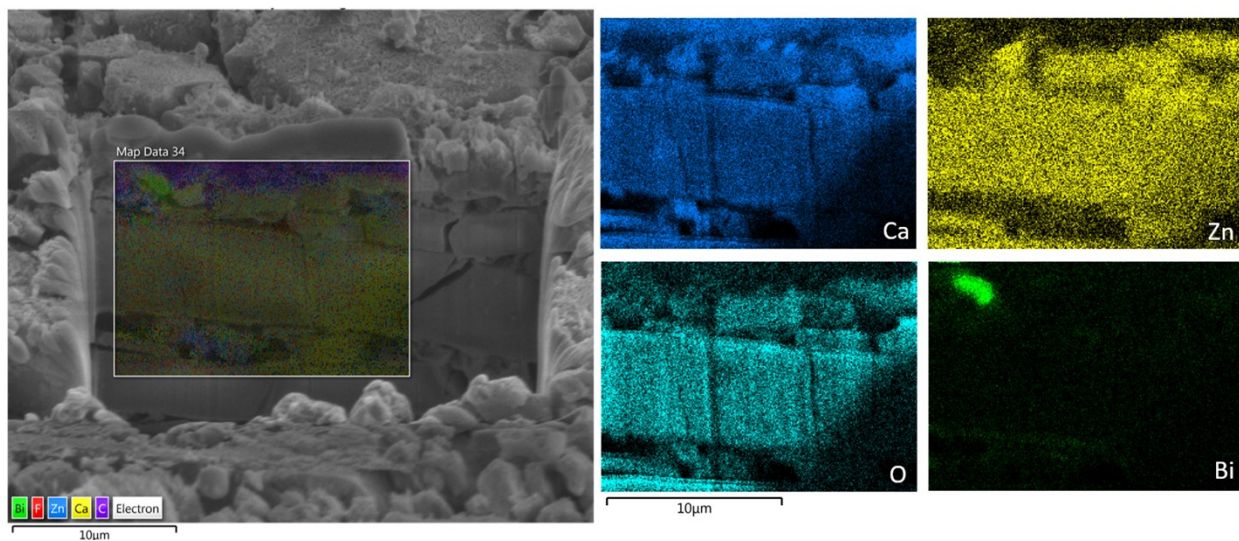

**Figure S12:** SEM-FIB EDS image of freshly rolled and pressed anode cell formulation #3 (86 wt.% CaZn, 10 wt.% Bi<sub>2</sub>O<sub>3</sub>, and 4 wt.% PTFE)



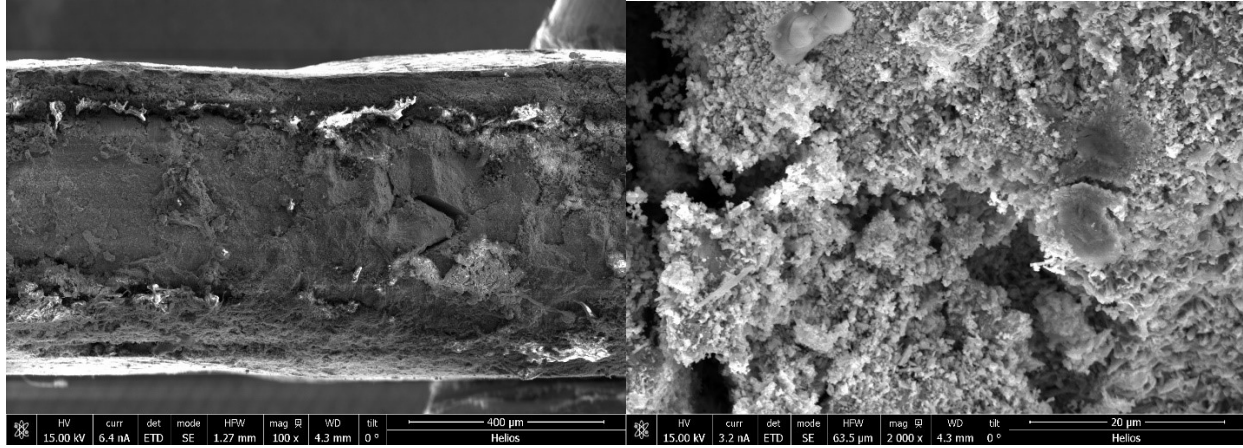

**Figure S13:** Cross-sectional SEM of cycled Cell #12-- anode cell formulation #1 majority Zn vs SiNi cathodes (60 wt.% Zn, 26 wt.% CaZn, 10 wt.% Bi<sub>2</sub>O<sub>3</sub>, and 4 wt.% PTFE)

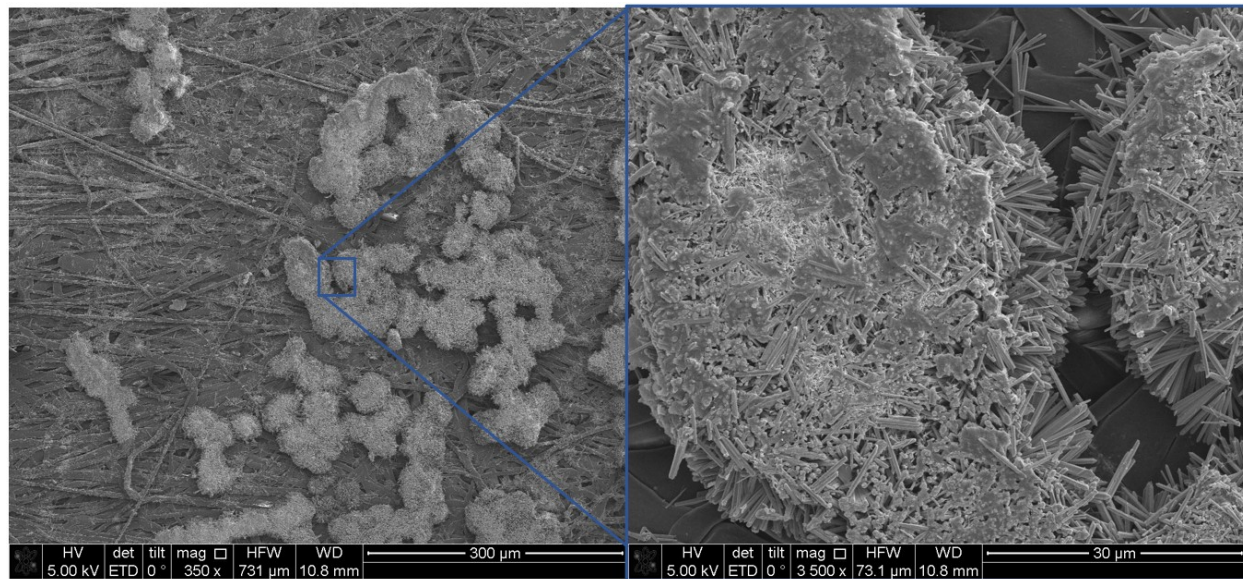

**Figure S14:** Top-down SEM image of failed cycled Cell #12-- anode cell formulation #1 majority Zn vs SiNi cathodes (60 wt.% Zn, 26 wt.% CaZn 10 wt.% Bi<sub>2</sub>O<sub>3</sub>, and 4 wt.% PTFE)



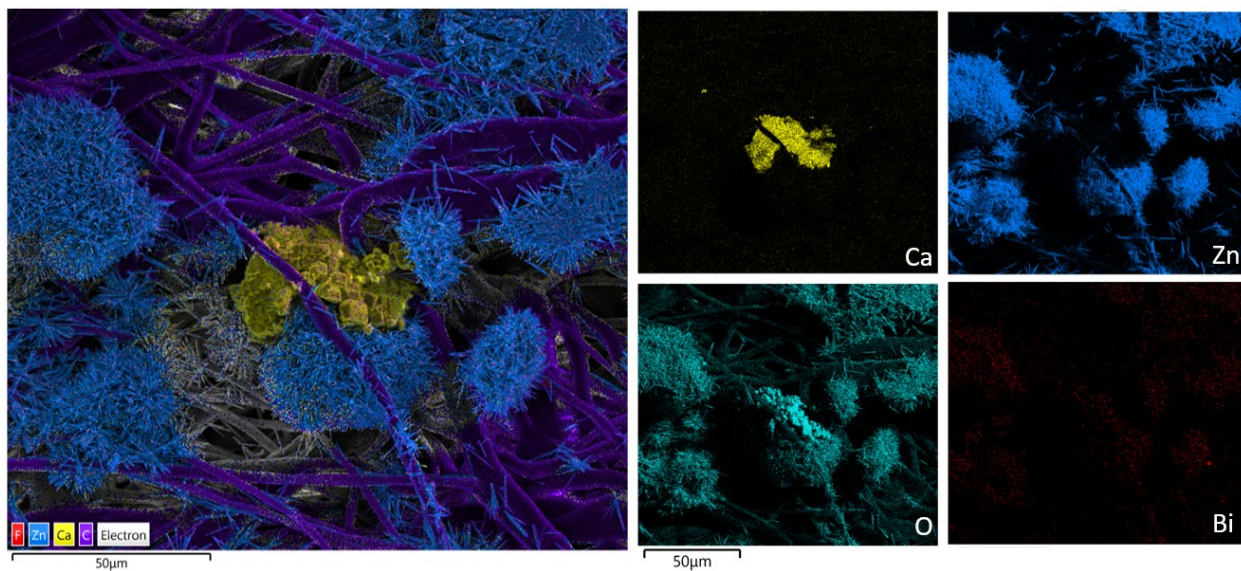

**Figure S15:** SEM-EDS mapping of cycled Cell #12 – anode cell formulation #1 majority Zn vs SiNi cathodes (60 wt.% Zn, 26 wt.% CaZn 10 wt.% Bi<sub>2</sub>O<sub>3</sub>, and 4 wt.% PTFE)

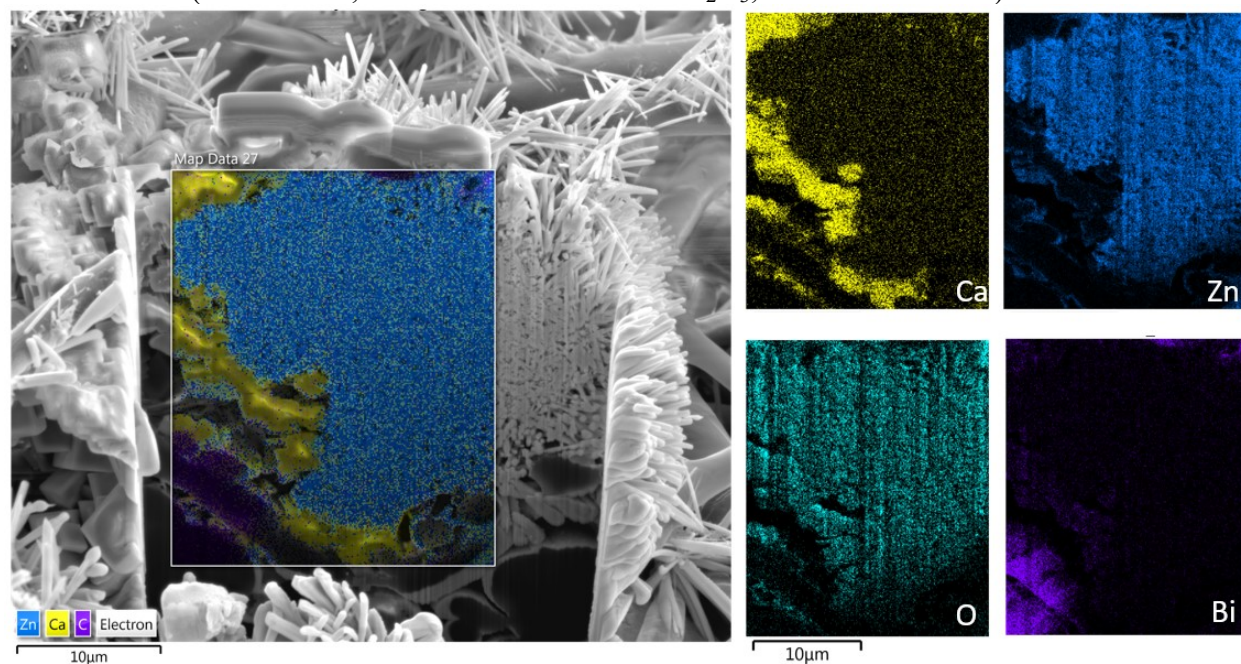

**Figure S16:** A) Image of cycled Cell #12 – anode cell formulation #1 majority Zn vs SiNi cathodes (60 wt.% Zn, 26 wt.% CaZn 10 wt.% Bi<sub>2</sub>O<sub>3</sub>, and 4 wt.% PTFE)



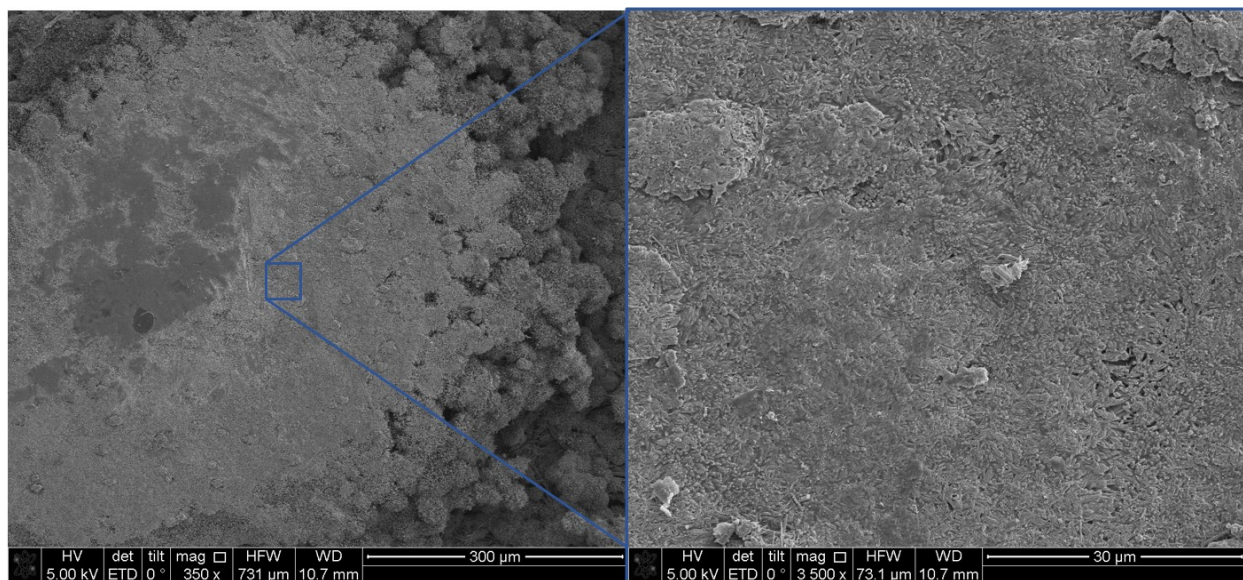

**Figure S17:** SEM image of cycled Cell #12 – anode cell formulation #1 majority Zn vs SiNi cathodes (60 wt.% Zn, 26 wt.% CaZn 10 wt.% Bi<sub>2</sub>O<sub>3</sub>, and 4 wt.% PTFE)

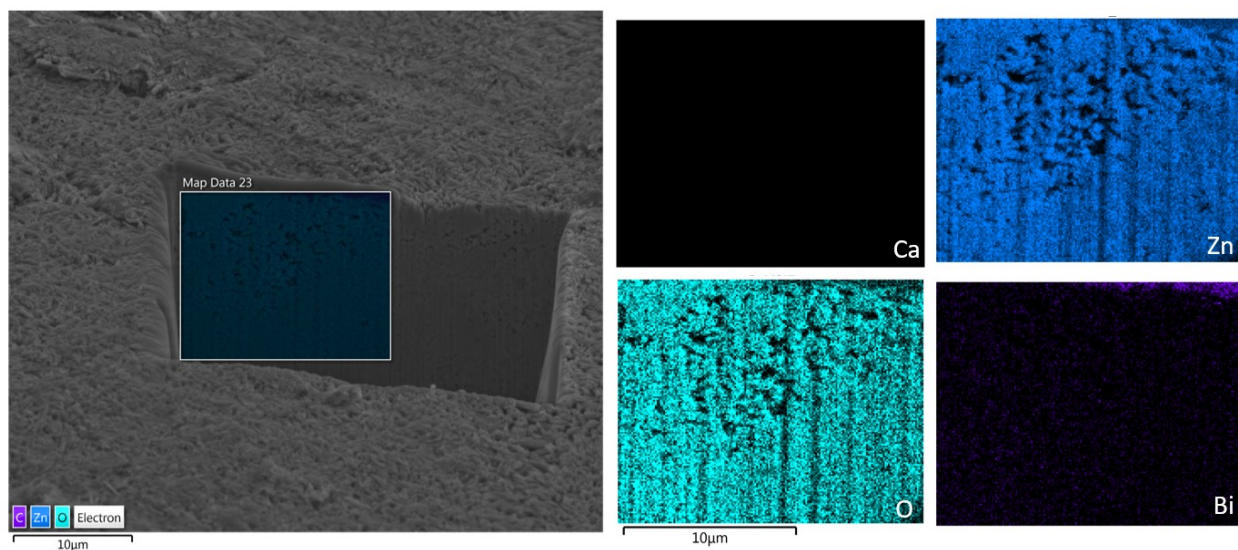

**Figure S18:** SEM-EDS mapping of cycled Cell #12 – anode cell formulation #1 majority Zn vs SiNi cathodes (60 wt.% Zn, 26 wt.% CaZn 10 wt.% Bi<sub>2</sub>O<sub>3</sub>, and 4 wt.% PTFE)

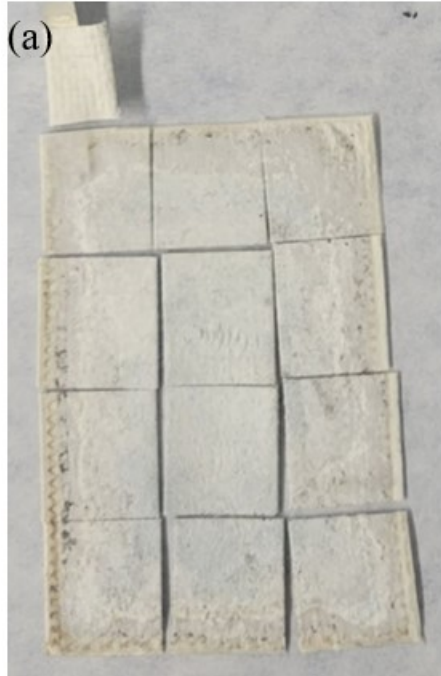

(b)

|                                          |                                          |                                          |
|------------------------------------------|------------------------------------------|------------------------------------------|
| <b>0.31 g</b><br>0.0240 -<br>0.0250 thou | <b>0.34 g</b><br>0.0295 -<br>0.0310 thou | <b>0.21 g</b><br>0.0230 -<br>0.0275 thou |
| <b>0.37 g</b><br>0.0275 -<br>0.0300 thou | <b>0.82 g</b><br>0.0290 -<br>0.0320 thou | <b>0.34 g</b><br>0.0280 -<br>0.0310 thou |
| <b>0.36 g</b><br>0.0280 -<br>0.0315 thou | <b>1.01 g</b><br>0.0290 -<br>0.0330 thou | <b>0.37 g</b><br>0.0295 -<br>0.0340 thou |
| <b>0.36 g</b><br>0.0250 -<br>0.0315 thou | <b>0.38 g</b><br>0.0290 -<br>0.0350 thou | <b>0.38 g</b><br>0.0240 -<br>0.0385 thou |

**Figure S19:** A) Optical image of cycled Cell #1D – anode cell formulation #1 majority Zn vs MnO<sub>2</sub> cathodes (60 wt.% Zn, 26 wt.% CaZn, 10 wt.% Bi<sub>2</sub>O<sub>3</sub>, and 4 wt.% PTFE) b) Table showing the weight and thickness range of the samples.



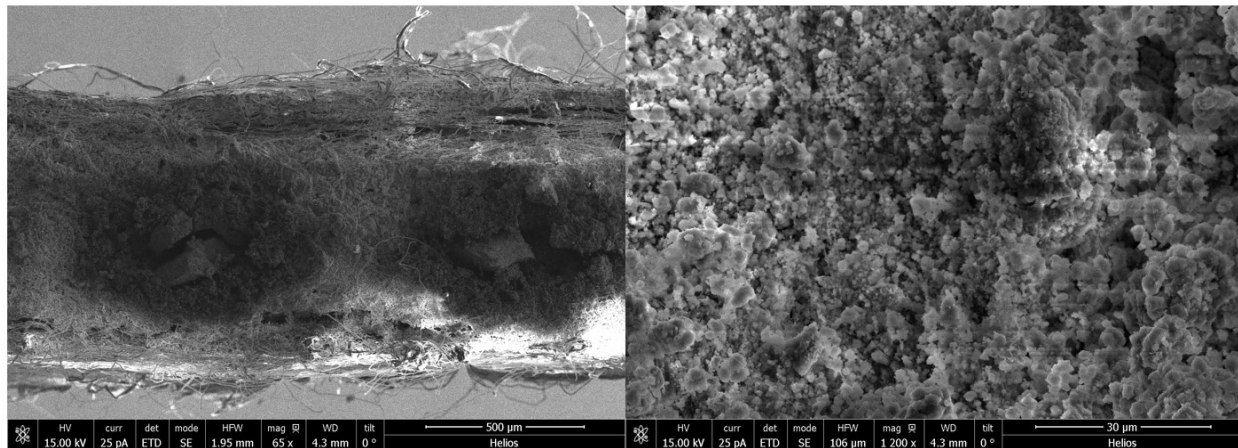

**Figure S20:** Cross-sectional SEM image of cycled Cell # 7-- anode cell formulation #3, (86 wt.% CaZn, 10 wt.% Bi<sub>2</sub>O<sub>3</sub>, and 4 wt.% PTFE)

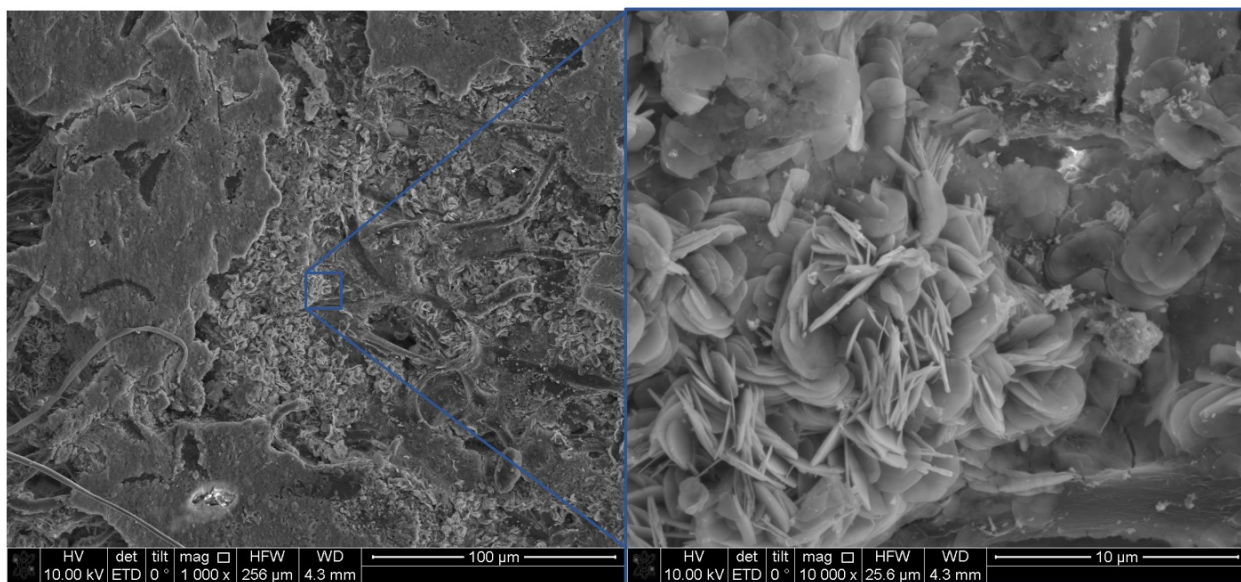

**Figure S21:** Top-down SEM image of cycled Cell # 7 – anode cell formulation #3, (86 wt.% CaZn, 10 wt.% Bi<sub>2</sub>O<sub>3</sub>, and 4 wt.% PTFE)



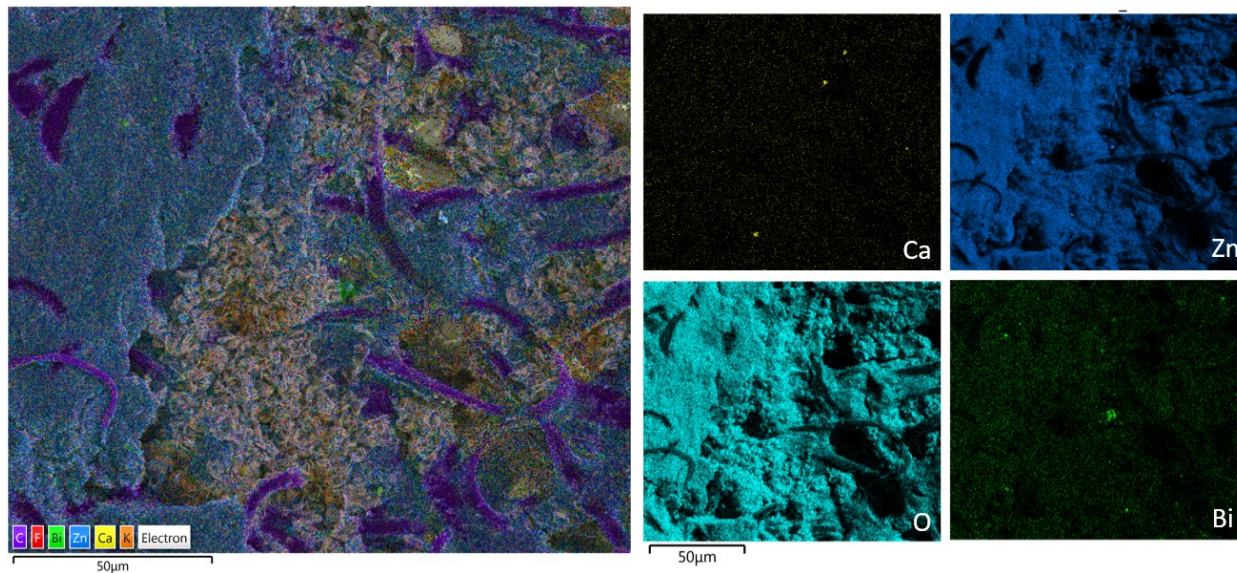

**Figure S22:** Top-down SEM-EDS image of cycled Cell # 7-- anode cell formulation #3, (86 wt.% CaZn, 10 wt.% Bi<sub>2</sub>O<sub>3</sub>, and 4 wt.% PTFE)

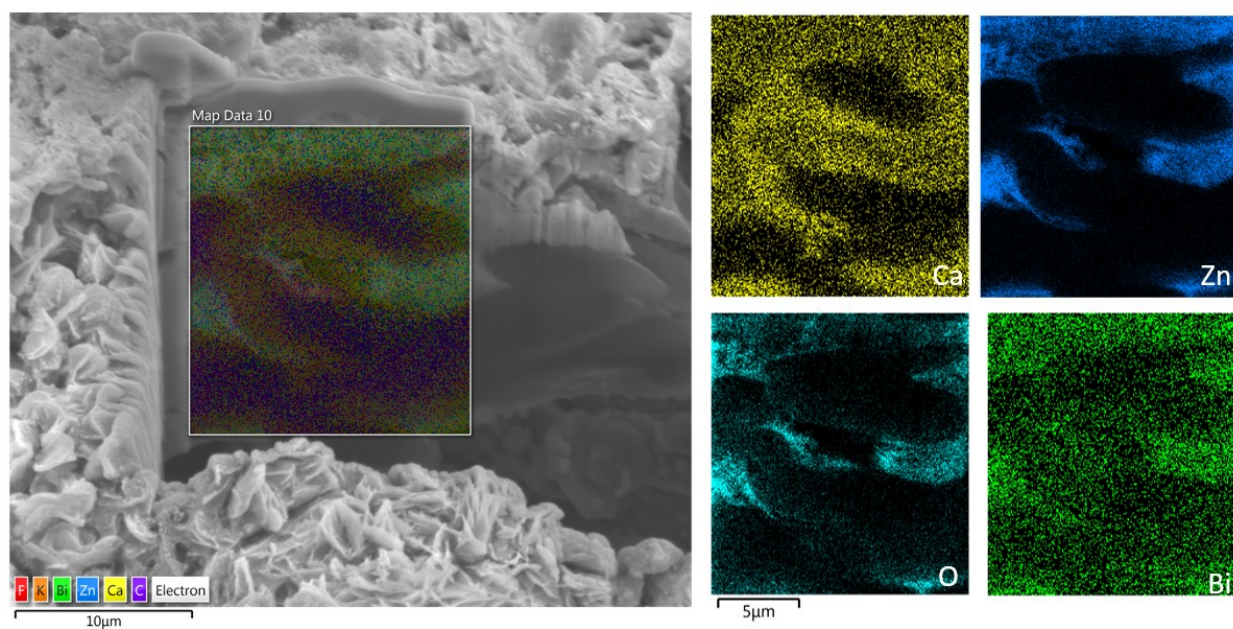

**Figure S23:** SEM-FIB EDS mapping of cycled Cell # 7-- anode cell formulation #3, (86 wt.% CaZn, 10 wt.% Bi<sub>2</sub>O<sub>3</sub>, and 4 wt.% PTFE)



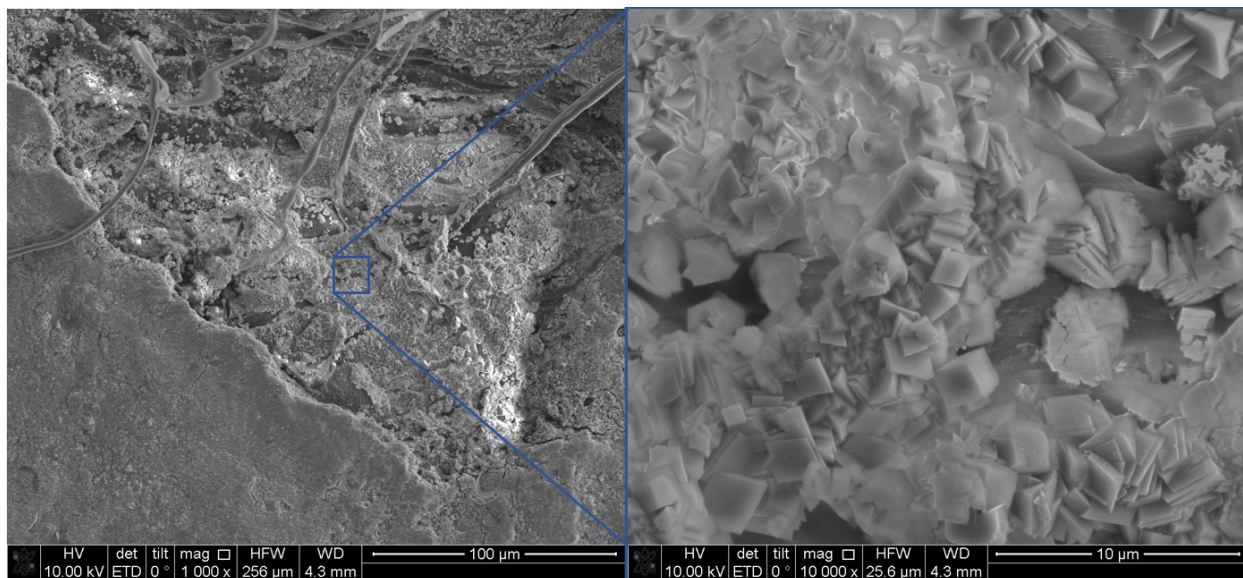

**Figure S24:** Top-down SEM image of cycled Cell # 7-- anode cell formulation #3, (86 wt.% CaZn, 10 wt.% Bi<sub>2</sub>O<sub>3</sub>, and 4 wt.% PTFE)

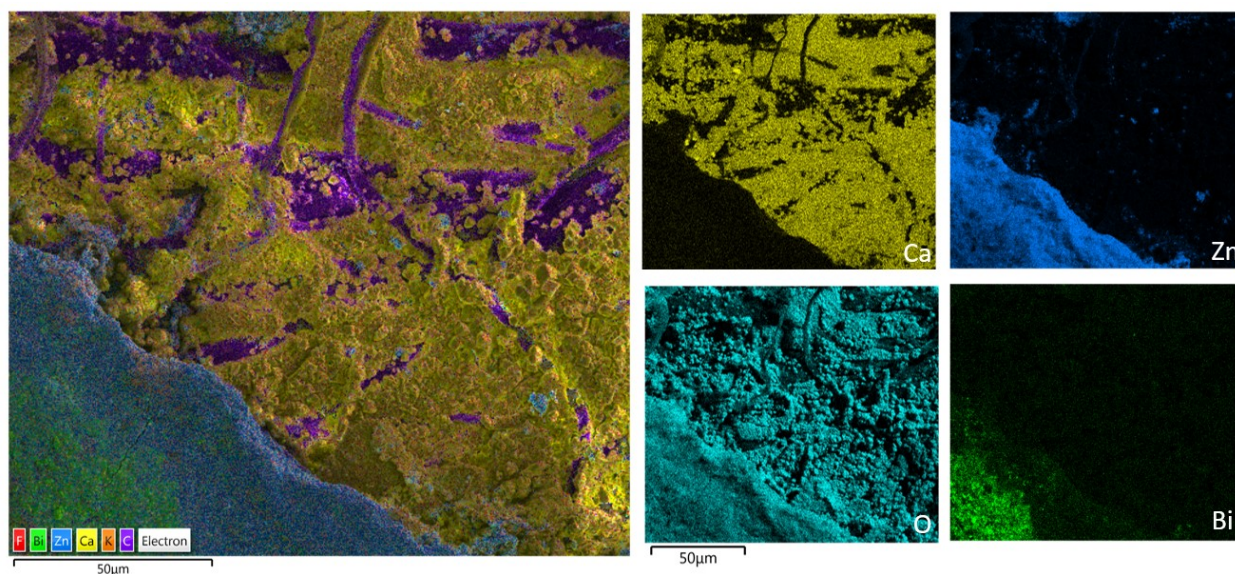

**Figure S25:** SEM-EDS mapping of cycled Cell # 7-- anode cell formulation #3, (86 wt.% CaZn, 10 wt.% Bi<sub>2</sub>O<sub>3</sub>, and 4 wt.% PTFE)

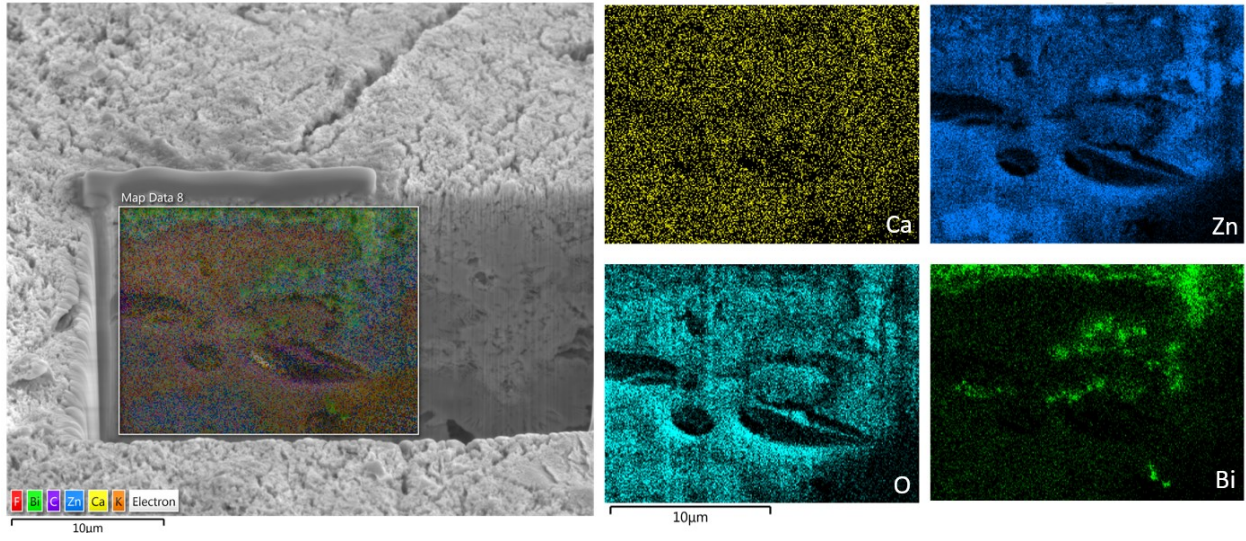

**Figure S26:** SEM-FIB EDS mapping of cycled Cell # 7– anode cell formulation #3, (86 wt.% CaZn, 10 wt.% Bi<sub>2</sub>O<sub>3</sub>, and 4 wt.% PTFE)
